# Supplementary material for: C-reactive protein, procalcitonin, D-dimer, and ferritin in severe coronavirus disease-2019: a meta-analysis
Source: PubMed Central journal article supplement — Ther Adv Respir Dis. 2020 Jul 2;14:1753466620937175. doi: 10.1177/1753466620937175 (PMC7336828; doi:10.1177/1753466620937175), 2020-07-02
Supplement: Reviewer_1_v.1.pdf [file Reviewer_1_v.1.pdf]

Reviewer 1 v.1

Comments to the Author

This analysis offers important current information about the clinical course and the prognosis of severe SARS-Cov-2 induced disease.

However, I have some minor concerns:

The paper should be corrected and revised by a native speaker.

The clinical message is important in my opinion. I additionally suggest to discuss the different meanings and values of the laboratory parameters described in this paper.

D-Dimers, ferritin and PCT are associated with mortality, whereas CRP is not. PCT may indicate an additional bacterial infection and might be not elevated by the virus itself.

Please speculate why CRP is of less value regarding mortality?

Can you give a weight to the impact of the described biomarkers?
