# Supplementary material for: C-reactive protein, procalcitonin, D-dimer, and ferritin in severe coronavirus disease-2019: a meta-analysis
Source: PubMed Central journal article supplement — Ther Adv Respir Dis. 2020 Jul 2;14:1753466620937175. doi: 10.1177/1753466620937175 (PMC7336828; doi:10.1177/1753466620937175), 2020-07-02
Supplement: Reviewer_2_v.1.pdf [file Reviewer_2_v.1.pdf]

Reviewer 2 v.1

Comments to the Author

I consider that the idea that the manuscript manages is good, but I found some drawbacks that I describe below.

- The grammar and punctuation of the manuscript should be reviewed since I found some errors such as in the conclusion where you write "This meta-analysis showed that elevated serum CRP, PCT, D-Dimer, and higher serum ferritin was associated with composite poor outcome in patients with COVID-19 "where you should use "were" because the subject is plural. On line 20 of page 9 appears "... 63%,  $p = 0.006$ ), However, ...", placing a comma instead of a period.

- As you mention within its limitations, the fact that there are already articles describing CRP, PCT, D-Dimer and Ferritin as prognostic markers in severe COVID-19 disease, makes that your publication lose novelty. Although I consider that your analysis is broader since there are more publications where these markers are analyzed.

- I consider that forest plots should not be cut so that it can be seen how much dispersion exists in the data

- Your discussion of the clinical implications is very limited and should be expanded. How can the four markers be used together? Would it be applicable with the use of corticosteroids or anti-coagulants? Are they also markers that a patient is improving?
