# Supplementary material for: C-reactive protein, procalcitonin, D-dimer, and ferritin in severe coronavirus disease-2019: a meta-analysis
Source: PubMed Central journal article supplement — Ther Adv Respir Dis. 2020 Jul 2;14:1753466620937175. doi: 10.1177/1753466620937175 (PMC7336828; doi:10.1177/1753466620937175), 2020-07-02
Supplement: Reviewer_2_v.2.pdf [file Reviewer_2_v.2.pdf]

Reviewer 2 v.2

Comments to the Author

The manuscript presents improvements in content according to the reviewers' observations and what makes it feasible to be published, but there are still some minor comments that I leave to the editor's consideration.

- There was a great advance in the writing of the manuscript, but I think there are some minor details that could be corrected by a native English speaker.
- D-dimer or d-dimer must be homogenized
